# Supplementary material for: Exploring the Impact of Organic Solvent Quality and Unusual Adduct Formation during LC-MS-Based Lipidomic Profiling
Source: Metabolites. 2023 Aug 22;13(9):966. doi: 10.3390/metabo13090966 (PMC10536874; doi:10.3390/metabo13090966)
Supplement: Supplementary file 1 [file metabolites-13-00966-s001.zip › metabolites-2568263-Supplementary_Materials_Tables S1-S2.xlsx]

## Sheet: Table S1
Table S1. Overview of annotated lipids in human serum extracts							Sample ID	S001	S002	S001	S002	S001	S002	S001	S002	S001	S002
							Matrix	serum	serum	serum	serum	serum	serum	serum	serum	serum	serum	serum	serum	serum	serum	serum	serum	serum	serum	serum	serum
							Sample name	vendor A	vendor A	vendor B	vendor B	vendor C	vendor C	vendor D	vendor D	vendor E	vendor E	vendor A	vendor B	vendor C	vendor D	vendor E	vendor A	vendor B	vendor C	vendor D	vendor E
							Replicate	R1	R2	R1	R2	R1	R2	R1	R2	R1	R2	mean (R1, R2)	mean (R1, R2)	mean (R1, R2)	mean (R1, R2)	mean (R1, R2)	norm. (%)	norm. (%)	norm. (%)	norm. (%)	norm. (%)						Mean norm. (%) per lipid subclass
Metabolite name (full)	Metabolite name	Class	Rt (min)	m/z	Platform	Identification	Unit																						Lipid subclass	Elution order	Vendor A	Vendor B	Vendor C	Vendor D	Vendor E
CAR 8:0; [M+H]+	CAR 8:0	CAR	0.249	288.217	LIPp	LipidBlast	arb. units	123597	129171	172743	173178	171050	180876	190452	198494	79004	80413	126384	172960	175963	194473	79708.5	0.649879	0.889381	0.90482	1	0.409869		CAR		0.625039	0.95474	0.918261	0.998483	0.428475
CAR 10:0; [M+H]+	CAR 10:0	CAR	0.287	316.248	LIPp	LipidBlast	arb. units	326939	325190	479509	492398	485628	468883	510126	506978	235743	237615	326064	485954	477256	508552	236679	0.641163	0.955563	0.93846	1	0.465398		LPC		0.437744	0.911769	0.826807	0.998481	0.261877
CAR 13:0; [M+H]+	CAR 13:0	CAR	0.407	358.295	LIPp	LipidBlast	arb. units	24167	23161	39085	36895	34097	34401	36961	40051	16408	18556	23664	37990	34249	38506	17482	0.614554	0.986599	0.889446	1	0.454007		LPE		0.668547	0.920794	0.862656	1	0.504254
CAR 14:0; [M+H]+	CAR 14:0	CAR	0.536	372.31	LIPp	LipidBlast	arb. units	69948	65630	106669	115164	104535	104554	117671	104740	49992	49155	67789	110916	104544	111206	49573.5	0.609583	0.997401	0.940102	1	0.445783		MG		0.517346	0.650723	0.315774	1	0.44725
CAR 14:1; [M+H]+	CAR 14:1	CAR	0.425	370.295	LIPp	LipidBlast	arb. units	164631	165845	237718	233362	255241	229684	273379	253980	119424	118094	165238	235540	242462	263680	118759	0.626662	0.893281	0.919535	1	0.450391		Cholesterol		0.754038	0.923118	1	0.845128	0.621361
CAR 16:0; [M+H]+	CAR 16:0	CAR	0.838	400.341	LIPp	LipidBlast	arb. units	308927	314006	527629	493936	497978	500327	556255	524460	231948	226167	311466	510782	499152	540358	229058	0.576408	0.945268	0.923745	1	0.4239		PI		0.627239	0.958585	0.930943	1	0.418989
CAR 16:1; [M+H]+	CAR 16:1	CAR	0.607	398.326	LIPp	LipidBlast	arb. units	64507	65054	98799	103826	95589	84179	100705	98847	42811	46128	64780.5	101312	89884	99776	44469.5	0.639413	1	0.887196	0.984834	0.438934		PC		0.398545	0.946571	0.874316	0.993003	0.206488
CAR 18:0; [M+H]+	CAR 18:0	CAR	1.262	428.373	LIPp	LipidBlast	arb. units	112821	112696	165492	162765	153429	155292	166050	170123	64869	68152	112758	164128	154360	168086	66510.5	0.670836	0.976453	0.91834	1	0.395692		PE, ether-		0.536826	0.967225	1	0.94186	0.34536
CAR 18:1; [M+H]+	CAR 18:1	CAR	0.917	426.357	LIPp	LipidBlast	arb. units	330903	320793	505211	491649	495225	492697	529844	523168	219475	209909	325848	498430	493961	526506	214692	0.618888	0.946675	0.938187	1	0.407767		SM		0.359868	0.943236	0.931309	0.975214	0.204453
CAR 18:2; [M+H]+	CAR 18:2	CAR	0.683	424.34	LIPp	LipidBlast	arb. units	273694	268917	425594	435352	416714	413640	459869	439973	174651	178993	271306	430473	415177	449921	176822	0.603007	0.956775	0.922778	1	0.393007		PC, ether-		0.345169	0.921434	0.864562	0.983367	0.183292
LPC 14:0/0:0; [M+H]+	LPC 14:0/0:0	LPC	0.5	468.308	LIPp	LipidBlast	arb. units	822944	766987	1593773	1582478	1454097	1457523	1737284	1715059	494173	505554	794966	1.58813e+06	1455810	1.72617e+06	499864	0.460537	0.920028	0.843375	1	0.289579		DG		0.384473	0.980001	0.966782	0.898816	0.235937
LPC 15:0/0:0; [M+H]+	LPC 15:0/0:0	LPC	0.623	482.323	LIPp	LipidBlast	arb. units	677939	678462	1336170	1337011	1166606	1155776	1426786	1427226	389551	396613	678200	1.33659e+06	1161191	1427006	393082	0.475261	0.93664	0.813725	1	0.275459		Cer		0.51351	0.850765	1	0.829603	0.336614
LPC 16:0/0:0; [M+H]+	LPC 16:0/0:0	LPC	0.782	496.339	LIPp	LipidBlast	arb. units	165543792	173657440	297824736	271965984	248303472	244351792	273087424	287864896	92149984	90161840	169600616	284895360	246327632	280476160	91155912	0.595308	1	0.864625	0.984488	0.319963		OxTG		0.4211	0.818458	0.98177	0.799105	0.260583
LPC 16:1/0:0; [M+H]+	LPC 16:1/0:0	LPC	0.555	494.323	LIPp	LipidBlast	arb. units	1406970	1425599	3193280	2986122	2693668	2783569	3301268	3248978	902462	871821	1.41628e+06	3089701	2.73862e+06	3275123	887142	0.432437	0.943385	0.836188	1	0.270873		CE		0.360073	0.947276	0.856862	0.856854	0.185994
LPC 17:0/0:0; [M+H]+	LPC 17:0/0:0	LPC	0.98	510.355	LIPp	LipidBlast	arb. units	903691	928775	1928873	1894597	1841808	1777167	2130075	2184296	608875	595101	916233	1911735	1.80949e+06	2.15719e+06	601988	0.424735	0.886217	0.838819	1	0.279062		TG		0.427308	0.908844	0.929434	0.863986	0.231486
LPC 18:0/0:0; [M+H]+	LPC 18:0/0:0	LPC	1.21	524.371	LIPp	LipidBlast	arb. units	44766316	45867564	92122408	92021912	84185352	83001456	95369392	98702768	24376070	24757032	45316940	92072160	83593404	97036080	24566551	0.467011	0.948845	0.861467	1	0.253169		All lipids		0.422485	0.919768	0.893577	0.938276	0.244693
LPC 18:1/0:0; [M+H]+	LPC 18:1/0:0	LPC	0.859	522.355	LIPp	LipidBlast	arb. units	14163729	14848713	30389062	28992266	28333220	28767444	34829476	32634580	8694686	8400154	14506221	29690664	28550332	33732028	8547420	0.430043	0.880192	0.846386	1	0.253392
LPC 18:2/0:0; [M+H]+	LPC 18:2/0:0	LPC	0.632	520.339	LIPp	LipidBlast	arb. units	25040934	24003818	48652504	47446196	41017812	40732516	50082388	49419952	13072631	13758060	24522376	48049350	40875164	49751170	1.34153e+07	0.4929	0.965793	0.821592	1	0.269649
LPC 18:3/0:0; [M+H]+	LPC 18:3/0:0	LPC	0.304	518.324	LIPp	LipidBlast	arb. units	18430	16574	37932	36245	35514	35234	44863	41158	13118	13660	17502	37088.5	35374	43010.5	13389	0.406924	0.862313	0.82245	1	0.311296
LPC 19:0/0:0; [M+H]+	LPC 19:0/0:0	LPC	1.464	538.386	LIPp	LipidBlast	arb. units	74312	73398	169943	171207	146904	156616	197152	190631	51443	43942	73855	170575	151760	193892	47692.5	0.380909	0.879745	0.782706	1	0.245975
LPC 19:1/0:0; [M+H]+	LPC 19:1/0:0	LPC	1.055	536.371	LIPp	LipidBlast	arb. units	48578	51410	107134	110789	99190	100932	110450	115599	31650	32394	49994	108962	100061	113024	32022	0.442329	0.964052	0.885304	1	0.283319
LPC 20:0/0:0; [M+H]+	LPC 20:0/0:0	LPC	1.686	552.402	LIPp	LipidBlast	arb. units	188084	167930	400180	390705	349165	350865	448111	458674	91056	92103	178007	395442	350015	453392	91579.5	0.392611	0.872186	0.771991	1	0.201987
LPC 20:1/0:0; [M+H]+	LPC 20:1/0:0	LPC	1.28	550.386	LIPp	LipidBlast	arb. units	228635	231868	545668	516846	452246	476269	559666	546709	138874	148437	230252	531257	464258	553188	143656	0.416227	0.960356	0.839241	1	0.259687
LPC 20:2/0:0; [M+H]+	LPC 20:2/0:0	LPC	0.952	548.371	LIPp	LipidBlast	arb. units	258337	269181	545325	561402	499944	512778	632954	615954	164964	163558	263759	553364	506361	624454	164261	0.422383	0.886156	0.810886	1	0.263047
LPC 20:3/0:0; [M+H]+	LPC 20:3/0:0	LPC	0.735	546.355	LIPp	LipidBlast	arb. units	1190263	1196948	2617350	2503098	2344951	2287360	2852372	2911461	722728	732942	1.19361e+06	2560224	2.31616e+06	2.88192e+06	727835	0.414171	0.888375	0.803686	1	0.252552
LPC 20:4/0:0; [M+H]+	LPC 20:4/0:0	LPC	0.613	544.339	LIPp	LipidBlast	arb. units	5969741	5925312	11806811	11889048	10380619	10649388	13041345	12976439	3372640	3580532	5.94753e+06	1.18479e+07	1.0515e+07	13008892	3476586	0.457189	0.910756	0.808294	1	0.267247
LPC 20:5/0:0 (1); [M+H]+	LPC 20:5/0:0 (1)	LPC	0.477	542.324	LIPp	LipidBlast	arb. units	249209	268337	511482	484842	447953	452398	544394	551286	160547	160617	258773	498162	450176	547840	160582	0.472351	0.90932	0.821728	1	0.293118
LPC 20:5/0:0 (2); [M+H]+	LPC 20:5/0:0 (2)	LPC	0.63	542.321	LIPp	LipidBlast	arb. units	2304750	2145788	3763347	3901815	3198110	3142167	5505728	5263124	1076617	1116080	2225269	3832581	3.17014e+06	5384426	1.09635e+06	0.413279	0.71179	0.588761	1	0.203615
LPC 22:4/0:0; [M+H]+	LPC 22:4/0:0	LPC	0.864	572.37	LIPp	LipidBlast	arb. units	162404	176299	361243	335827	335115	337231	407410	378763	92002	97138	169352	348535	336173	393086	94570	0.430825	0.886662	0.855214	1	0.240583
LPC 22:5/0:0 (1); [M+H]+	LPC 22:5/0:0 (1)	LPC	0.662	570.355	LIPp	LipidBlast	arb. units	275947	277470	622690	597721	567387	556511	640305	629552	180907	180976	276708	610206	561949	634928	180942	0.43581	0.961062	0.885059	1	0.284979
LPC 22:5/0:0 (2); [M+H]+	LPC 22:5/0:0 (2)	LPC	0.755	570.355	LIPp	LipidBlast	arb. units	110886	108119	230235	230385	221191	214150	258289	250051	65909	64139	109502	230310	217670	254170	65024	0.430824	0.906126	0.856397	1	0.255829
LPC 22:6/0:0; [M+H]+	LPC 22:6/0:0	LPC	0.578	568.339	LIPp	LipidBlast	arb. units	731109	709898	1561538	1566130	1430173	1438922	1796427	1715122	468147	442761	720504	1563834	1.43455e+06	1.75577e+06	455454	0.410362	0.89068	0.817045	1	0.259403
LPC 24:0/0:0; [M+H]+	LPC 24:0/0:0	LPC	2.239	608.465	LIPp	LipidBlast	arb. units	51827	56086	151324	145407	150334	129076	153746	137218	26171	30026	53956.5	148366	139705	145482	28098.5	0.363673	1	0.941627	0.980565	0.189387
LPE 16:0; [M+H]+	LPE 16:0	LPE	0.798	454.291	LIPp	LipidBlast	arb. units	290461	292940	402824	467796	409491	383654	457674	502404	260899	232844	291700	435310	396572	480039	246872	0.60766	0.906822	0.826126	1	0.514274
LPE 17:0; [M+H]+	LPE 17:0	LPE	1.005	468.308	LIPp	LipidBlast	arb. units	24085	24287	27964	28669	25058	29083	30537	32270	16774	19193	24186	28316.5	27070.5	31403.5	17983.5	0.770169	0.901699	0.862022	1	0.572659
LPE 18:0; [M+H]+	LPE 18:0	LPE	1.238	482.324	LIPp	LipidBlast	arb. units	388181	351450	539550	560060	526718	518566	590560	571123	279720	286630	369816	549805	522642	580842	283175	0.636689	0.946566	0.899801	1	0.487525
LPE 18:2; [M+H]+	LPE 18:2	LPE	0.643	478.293	LIPp	LipidBlast	arb. units	372416	410491	548236	522478	485583	506744	578780	596304	282347	282709	391454	535357	496164	587542	282528	0.666256	0.911181	0.844473	1	0.480864
LPE 20:4; [M+H]+	LPE 20:4	LPE	0.623	502.292	LIPp	LipidBlast	arb. units	306672	285737	392203	420409	372604	386641	448053	414182	205745	211476	296204	406306	379622	431118	208610	0.687062	0.942448	0.880555	1	0.483883
LPE 22:6; [M+H]+	LPE 22:6	LPE	0.59	526.292	LIPp	LipidBlast	arb. units	94843	93229	129371	138379	125322	126912	149796	142493	72243	69903	94036	133875	126117	146144	71073	0.643445	0.916045	0.862961	1	0.48632
MG 16:0; [M+Na]+	MG 16:0	MG	1.417	353.266	LIPp	RTMZ-Lib	arb. units	43725	49147	83361	87391	29878	32302	117261	123897	50145	51506	46436	85376	31090	120579	50825.5	0.385109	0.70805	0.257839	1	0.421512
MG 18:1; [M+Na]+	MG 18:1	MG	1.507	379.281	LIPp	RTMZ-Lib	arb. units	111902	120324	128946	123718	63118	64211	200520	195323	89294	87124	116113	126332	63664.5	197922	88209	0.586662	0.638293	0.321665	1	0.445677
MG 18:2; [M+Na]+	MG 18:2	MG	1.158	377.266	LIPp	RTMZ-Lib	arb. units	58700	61380	65543	59826	36146	39970	104088	102851	50750	47455	60040	62684.5	38058	103470	49102.5	0.580268	0.605826	0.367819	1	0.47456
Cholesterol; [M-H2O+H]+	Cholesterol	Cholesterol	2.544	369.351	LIPp	RTMZ-Lib	arb. units	5424567	5939354	6913296	6998804	7652779	7417984	6100148	6636574	4712559	4651828	5.68196e+06	6956050	7.53538e+06	6368361	4.68219e+06	0.754038	0.923118	1	0.845128	0.621361
PI 38:4; [M+NH4]+	PI 38:4	PI	2.702	904.586	LIPp	LipidBlast	arb. units	864017	818170	1292338	1278481	1279564	1217123	1373854	1308036	587966	535716	841094	1.28541e+06	1.24834e+06	1340945	561841	0.627239	0.958585	0.930943	1	0.418989
PC 30:0; [M+H]+	PC 30:0	PC	2.67	706.536	LIPp	LipidBlast	arb. units	834247	809539	2539108	2430512	2131669	2252160	2669217	2470627	433261	433213	821893	2484810	2.19191e+06	2569922	433237	0.319812	0.966881	0.852911	1	0.16858
PC 32:0; PC 16:0_16:0; [M+H]+	PC 32:0	PC	2.994	734.568	LIPp	LipidBlast	arb. units	9584172	10152116	22752482	21579816	20863682	21146460	20878468	20775618	4336964	4217792	9868144	22166149	21005071	20827043	4277378	0.44519	1	0.947619	0.939588	0.192969
PC 32:1; [M+H]+	PC 32:1	PC	2.707	732.552	LIPp	LipidBlast	arb. units	6234452	6138799	14895752	14342139	13538147	13562423	15167262	14225629	2876105	2707979	6.18663e+06	1.46189e+07	13550285	1.46964e+07	2792042	0.420961	0.994727	0.922011	1	0.189981
PC 32:2; [M+H]+	PC 32:2	PC	2.465	730.537	LIPp	LipidBlast	arb. units	1028135	1020344	2792595	2948186	2619766	2595961	3028619	3189398	573043	564083	1.02424e+06	2.87039e+06	2.60786e+06	3.10901e+06	568563	0.329442	0.923249	0.838809	1	0.182876
PC 33:1; [M+H]+	PC 33:1	PC	2.856	746.568	LIPp	LipidBlast	arb. units	945384	895701	2444578	2820484	2206765	2462218	2639232	2854556	421779	450375	920542	2632531	2.33449e+06	2746894	436077	0.335121	0.958366	0.849866	1	0.158753
PC 33:2; [M+H]+	PC 33:2	PC	2.617	744.552	LIPp	LipidBlast	arb. units	966023	905479	2886710	2840919	2535905	2744865	3029973	2917207	508862	509112	935751	2.86381e+06	2640385	2973590	508987	0.314687	0.963083	0.887945	1	0.171169
PC 34:0; [M+H]+	PC 34:0	PC	3.313	762.599	LIPp	LipidBlast	arb. units	1104212	1137657	3408660	3516913	3215766	3487294	3870941	3703130	581951	591345	1.12093e+06	3.46279e+06	3351530	3.78704e+06	586648	0.295993	0.914379	0.885001	1	0.15491
PC 34:1; [M+H]+	PC 34:1	PC	3.017	760.584	LIPp	LipidBlast	arb. units	164377456	163195616	305903360	321814656	292581344	330156832	313756128	309535904	78906936	80130472	163786536	313859008	311369088	311646016	79518704	0.521847	1	0.992067	0.992949	0.253358
PC 34:2; PC 16:0_18:2; [M+H]+	PC 34:2	PC	2.766	758.568	LIPp	LipidBlast	arb. units	364632640	372882880	636815360	693396672	611805952	633383488	645372992	656546560	206300480	193548912	368757760	665106016	622594720	650959776	199924696	0.554435	1	0.936083	0.978731	0.300591
PC 34:3 (1); [M+H]+	PC 34:3 (1)	PC	1.951	756.552	LIPp	LipidBlast	arb. units	640124	611164	1459452	1496766	1380904	1352378	1718008	1676036	339490	324566	625644	1478109	1366641	1697022	332028	0.368672	0.871002	0.805317	1	0.195653
PC 34:3 (2); PC 16:0_18:3; [M+H]+	PC 34:3 (2)	PC	2.018	756.552	LIPp	LipidBlast	arb. units	1182525	1286524	3050164	2779753	2450912	2517642	2947768	2877394	637818	588091	1.23452e+06	2.91496e+06	2484277	2912581	612954	0.423514	1	0.852251	0.999184	0.210279
PC 34:3 (3); [M+H]+	PC 34:3 (3)	PC	2.543	756.553	LIPp	LipidBlast	arb. units	10944612	11090135	15329921	15518392	15024103	14164077	14868083	15305728	5891518	6120886	1.10174e+07	1.54242e+07	14594090	1.50869e+07	6006202	0.714293	1	0.946184	0.978135	0.389402
PC 34:4; [M+H]+	PC 34:4	PC	2.417	754.537	LIPp	LipidBlast	arb. units	292431	276204	753849	743435	720574	715467	883307	829924	160223	164334	284318	748642	718020	856616	162278	0.331908	0.873953	0.838206	1	0.189441
PC 35:1; [M+H]+	PC 35:1	PC	3.17	774.599	LIPp	LipidBlast	arb. units	882355	871939	2937607	2849207	2425208	2675492	3106588	3009233	475648	447859	877147	2893407	2550350	3.05791e+06	461754	0.286845	0.946204	0.834017	1	0.151003
PC 35:2; [M+H]+	PC 35:2	PC	2.92	772.584	LIPp	LipidBlast	arb. units	2344532	2263680	7686173	7066705	6589154	6532288	7723895	7604520	1252244	1275010	2304106	7376439	6560721	7.66421e+06	1263627	0.300632	0.962453	0.856021	1	0.164874
PC 35:4; [M+H]+	PC 35:4	PC	2.555	768.552	LIPp	LipidBlast	arb. units	1016348	935287	1536305	1455667	1451912	1418898	1413984	1421219	472710	513182	975818	1495986	1435405	1.4176e+06	492946	0.652291	1	0.959504	0.947603	0.329512
PC 36:1; [M+H]+	PC 36:1	PC	3.335	788.615	LIPp	LipidBlast	arb. units	12462540	13249029	40003800	38816212	38669104	37226884	42509596	42775424	6692086	6861468	1.28558e+07	39410006	37947994	42642510	6776777	0.301478	0.924195	0.88991	1	0.158921
PC 36:2; PC 18:0_18:2; [M+H]+	PC 36:2	PC	3.08	786.599	LIPp	LipidBlast	arb. units	153619984	147127168	353256160	346400416	332856928	327958784	339288576	347610048	75830536	77654504	150373576	349828288	330407856	343449312	76742520	0.42985	1	0.944486	0.981765	0.219372
PC 36:3 (1); [M+H]+	PC 36:3 (1)	PC	2.165	784.584	LIPp	LipidBlast	arb. units	445767	472209	1211883	1137058	1056302	1069059	1273323	1354355	240803	238625	458988	1.17447e+06	1.06268e+06	1313839	239714	0.349349	0.893923	0.808836	1	0.182453
PC 36:3 (2); [M+H]+	PC 36:3 (2)	PC	2.239	784.584	LIPp	LipidBlast	arb. units	585010	646177	1705324	1649348	1594328	1465225	1763520	1776344	345081	337952	615594	1677336	1.52978e+06	1769932	341516	0.347806	0.947684	0.864314	1	0.192955
PC 36:3 (3); [M+H]+	PC 36:3 (3)	PC	2.306	784.583	LIPp	LipidBlast	arb. units	412859	359752	1073384	1068678	902872	986181	1263041	1247058	200871	202982	386306	1071031	944526	1.25505e+06	201926	0.307801	0.853377	0.752581	1	0.160891
PC 36:3 (4); [M+H]+	PC 36:3 (4)	PC	2.787	784.583	LIPp	LipidBlast	arb. units	35580368	35256140	74341168	74877088	73133096	73415472	73744712	78509864	18335814	18950620	35418254	74609128	73274284	76127288	18643217	0.46525	0.980058	0.962523	1	0.244895
PC 36:3 (5); PC 16:0_20:3; [M+H]+	PC 36:3 (5)	PC	2.84	784.584	LIPp	LipidBlast	arb. units	29120166	28713078	80768464	86250672	73720640	79532720	85613912	85070528	14465358	14297070	28916622	83509568	76626680	85342220	14381214	0.338831	0.978526	0.897875	1	0.168512
PC 36:4 (1); [M+H]+	PC 36:4 (1)	PC	2.087	782.567	LIPp	LipidBlast	arb. units	297108	247295	665615	643574	617786	651406	747753	796193	143427	163419	272202	654594	634596	771973	153423	0.352605	0.84795	0.822044	1	0.198741
PC 36:4 (2); [M+H]+	PC 36:4 (2)	PC	2.185	782.568	LIPp	LipidBlast	arb. units	258991	255757	709239	669373	621908	609379	740335	817454	137807	142427	257374	689306	615644	778894	140117	0.330435	0.88498	0.790407	1	0.179892
PC 36:4 (3); PC 18:2_18:2; [M+H]+	PC 36:4 (3)	PC	2.549	782.568	LIPp	LipidBlast	arb. units	40693392	41072580	56068180	56622988	54532984	52576120	54996452	55188576	21342840	22057216	40882986	56345584	53554552	55092514	21700028	0.725576	1	0.950466	0.977761	0.385124
PC 36:4 (4); PC 16:0_20:4; [M+H]+	PC 36:4 (4)	PC	2.714	782.568	LIPp	LipidBlast	arb. units	89980648	88013824	214154048	208716560	196721984	192853376	219686800	199430880	41586292	39619332	88997236	211435304	194787680	209558840	40602812	0.420919	1	0.921264	0.991125	0.192034
PC 36:5 (1); [M+H]+	PC 36:5 (1)	PC	2.033	780.552	LIPp	LipidBlast	arb. units	366393	348997	835401	816100	709879	822611	873125	876874	178363	179979	357695	825750	766245	875000	179171	0.408795	0.943715	0.875709	1	0.204767
PC 36:5 (2); [M+H]+	PC 36:5 (2)	PC	2.356	780.553	LIPp	LipidBlast	arb. units	290363	286840	751984	808005	710746	713771	866089	876657	157107	149986	288602	779994	712258	871373	153546	0.331203	0.895133	0.817398	1	0.176212
PC 36:5 (3); PC 16:0_20:5; [M+H]+	PC 36:5 (3)	PC	2.523	780.552	LIPp	LipidBlast	arb. units	8123840	8165724	13267386	12683160	11675925	11800056	13075518	13447298	4550071	4431148	8144782	12975273	1.1738e+07	13261408	4.49061e+06	0.614172	0.978423	0.885124	1	0.338622
PC 37:2; [M+H]+	PC 37:2	PC	3.234	800.616	LIPp	LipidBlast	arb. units	286073	277229	884285	884770	806188	874865	933335	955971	165495	158126	281651	884528	840526	944653	161810	0.298153	0.936352	0.889773	1	0.171291
PC 38:2; [M+H]+	PC 38:2	PC	3.369	814.63	LIPp	LipidBlast	arb. units	1097859	1035646	3479482	3611357	3249274	3172353	3726228	3814612	597107	558338	1.06675e+06	3.54542e+06	3.21081e+06	3770420	577722	0.282927	0.940325	0.85158	1	0.153225
PC 38:3; PC 18:0_20:3; [M+H]+	PC 38:3	PC	3.159	812.615	LIPp	LipidBlast	arb. units	10173631	10374908	34057848	32127700	30473384	30272426	34777660	35214740	5477786	5468214	1.02743e+07	33092774	30372905	34996200	5473000	0.293582	0.94561	0.867892	1	0.156388
PC 38:4 (1); [M+H]+	PC 38:4 (1)	PC	2.335	810.598	LIPp	LipidBlast	arb. units	298587	284048	957292	818376	750133	851447	955963	909780	167480	154722	291318	887834	800790	932872	161101	0.31228	0.951722	0.858414	1	0.172694
PC 38:4 (2); PC 18:0_20:4; [M+H]+	PC 38:4 (2)	PC	3.022	810.599	LIPp	LipidBlast	arb. units	73768224	73140400	140074256	145148656	135718416	150324080	142958752	138476080	35228380	35068884	73454312	142611456	143021248	140717416	35148632	0.51359	0.997135	1	0.983892	0.245758
PC 38:4 (3); [M+H]+	PC 38:4 (3)	PC	3.333	810.597	LIPp	LipidBlast	arb. units	2409706	2431156	4946102	5059574	3249608	3275538	6613506	6538317	1063811	1136784	2420431	5002838	3262573	6.57591e+06	1.1003e+06	0.368075	0.760782	0.49614	1	0.167322
PC 38:5 (1); [M+H]+	PC 38:5 (1)	PC	2.252	808.584	LIPp	LipidBlast	arb. units	174082	172893	475535	450667	454478	399337	487566	495421	99051	100308	173488	463101	426908	491494	99679.5	0.35298	0.942232	0.868592	1	0.202809
PC 38:5 (2); [M+H]+	PC 38:5 (2)	PC	2.728	808.583	LIPp	LipidBlast	arb. units	12590375	12268060	31742432	30863118	27969482	28319682	31094368	29011060	5828266	5883772	1.24292e+07	31302775	28144582	30052714	5856019	0.397064	1	0.899108	0.960065	0.187077
PC 38:6 (1); [M+H]+	PC 38:6 (1)	PC	2.509	806.568	LIPp	LipidBlast	arb. units	4477276	4500556	8120613	7874215	7216113	7215616	8130152	8346794	2559668	2470638	4488916	7997414	7.21586e+06	8238473	2515153	0.544872	0.97074	0.875874	1	0.305294
PC 38:6 (2); PC 16:0_22:6; [M+H]+	PC 38:6 (2)	PC	2.629	806.567	LIPp	LipidBlast	arb. units	12615756	12717950	35137288	35421532	31725972	34048368	37506616	36130648	6211586	6115386	12666853	35279410	32887170	36818632	6163486	0.344034	0.958194	0.893221	1	0.167401
PC 40:4; [M+H]+	PC 40:4	PC	3.249	838.631	LIPp	LipidBlast	arb. units	1005837	996965	3091861	3174727	3019392	3104731	3516250	3548334	558676	551585	1001401	3133294	3.06206e+06	3532292	555130	0.283499	0.887043	0.866877	1	0.157159
PC 40:5; [M+H]+	PC 40:5	PC	3.024	836.615	LIPp	LipidBlast	arb. units	4100214	4200096	7767938	7629332	7348702	8567290	7925306	7486786	1793688	1846055	4150155	7698635	7957996	7706046	1.81987e+06	0.521508	0.967409	1	0.96834	0.228685
PC 40:6; PC 18:0_22:6; [M+H]+	PC 40:6	PC	2.928	834.599	LIPp	LipidBlast	arb. units	3263806	3253323	11140309	10405744	9659541	9569805	11515867	11338918	1776672	1814801	3.25856e+06	1.0773e+07	9614673	1.14274e+07	1.79574e+06	0.285154	0.942737	0.841371	1	0.157143
PE P-36:4; PE P-16:0_20:4; [M+H]+	PE P-36:4	EtherPE	2.922	724.526	LIPp	LipidBlast	arb. units	597776	579123	1265861	1124901	1191558	1238360	1200705	1131863	408088	399758	588450	1195381	1214959	1166284	403923	0.484337	0.983886	1	0.959937	0.332458
PE P-38:4; PE P-18:0_20:4; [M+H]+	PE P-38:4	EtherPE	3.244	752.558	LIPp	LipidBlast	arb. units	919753	910488	1380575	1433146	1462684	1557136	1369781	1391022	561697	554186	915120	1.40686e+06	1509910	1.3804e+06	557942	0.606076	0.931751	1	0.914228	0.36952
PE P-38:5; PE P-18:1_20:4; [M+H]+	PE P-38:5	EtherPE	2.939	750.542	LIPp	LipidBlast	arb. units	438285	427570	827346	814309	869183	795716	806247	777766	290574	265673	432928	820828	832450	792006	278124	0.520065	0.986039	1	0.951417	0.334103
SM 32:1;O2; [M+H]+	SM 32:1;O2	SM	2.327	675.542	LIPp	LipidBlast	arb. units	2286244	2367740	7581346	7086038	6344303	6894347	7777926	7759626	1362672	1336044	2326992	7333692	6619325	7768776	1349358	0.299531	0.943996	0.852042	1	0.17369
SM 32:2;O2; [M+H]+	SM 32:2;O2	SM	2.084	673.527	LIPp	LipidBlast	arb. units	188180	174925	482996	462335	451776	456048	522706	541864	110669	112668	181552	472666	453912	532285	111668	0.341081	0.887993	0.852761	1	0.209791
SM 33:1;O2; [M+H]+	SM 33:1;O2	SM	2.481	689.558	LIPp	LipidBlast	arb. units	1168594	1107262	3365618	3331529	3026948	2999436	3487821	3546540	681988	673182	1137928	3.34857e+06	3013192	3.51718e+06	677585	0.323534	0.952062	0.856707	1	0.19265
SM 34:0;O2; [M+H]+	SM 34:0;O2	SM	2.757	705.59	LIPp	LipidBlast	arb. units	2495454	2773980	4926680	5768174	4852284	4734762	4939799	4531991	1434176	1355646	2634717	5347427	4793523	4735895	1394911	0.492707	1	0.896417	0.88564	0.260856
SM 34:1;O2 (1); [M+H]+	SM 34:1;O2 (1)	SM	2.542	719.569	LIPp	LipidBlast	arb. units	1680492	1438331	1904265	1938064	1757824	1744521	1774765	1825608	979546	1014699	1.55941e+06	1.92116e+06	1.75117e+06	1.80019e+06	997122	0.811701	1	0.911516	0.937029	0.51902
SM 34:1;O2 (2); SM 18:1;O2/16:0; [M+H]+	SM 34:1;O2 (2)	SM	2.64	703.573	LIPp	LipidBlast	arb. units	40990996	40764440	111688136	114013464	104079304	109310728	116572048	114721112	21020216	21446550	40877718	112850800	106695016	115646580	21233383	0.353471	0.975825	0.922596	1	0.183606
SM 34:2;O2; [M+H]+	SM 34:2;O2	SM	2.369	701.558	LIPp	LipidBlast	arb. units	4068500	4388294	11226008	11515506	11193888	10937607	12879222	12475944	2457014	2485008	4228397	11370757	1.10657e+07	12677583	2471011	0.333533	0.896918	0.872859	1	0.194912
SM 35:2;O2; [M+H]+	SM 35:2;O2	SM	2.531	715.574	LIPp	LipidBlast	arb. units	828855	857251	1075377	1018432	933900	883374	974400	1027904	446881	442257	843053	1.0469e+06	908637	1001152	444569	0.805282	1	0.867927	0.956297	0.424651
SM 36:1;O2; [M+H]+	SM 36:1;O2	SM	2.98	731.606	LIPp	LipidBlast	arb. units	6818956	6561575	19955106	20730786	19836406	19936738	19045828	18765966	3234897	3239828	6.69027e+06	20342946	19886572	18905897	3.23736e+06	0.328874	1	0.977566	0.929359	0.159139
SM 36:2;O2; [M+H]+	SM 36:2;O2	SM	2.682	729.589	LIPp	LipidBlast	arb. units	2711141	2864230	8608053	8179880	7482277	7972751	9034789	8139522	1584973	1533107	2.78769e+06	8.39397e+06	7727514	8.58716e+06	1559040	0.324634	0.977503	0.899892	1	0.181555
SM 36:3;O2; [M+H]+	SM 36:3;O2	SM	2.437	727.574	LIPp	LipidBlast	arb. units	124621	124456	368559	358398	347978	333153	396647	377259	81810	73526	124538	363478	340566	386953	77668	0.321844	0.939335	0.880121	1	0.200717
SM 38:0;O2; [M+H]+	SM 38:0;O2	SM	3.417	761.652	LIPp	LipidBlast	arb. units	69793	77320	237025	230530	259472	255473	245250	251371	47312	44426	73556.5	233778	257472	248310	45869	0.285687	0.907971	1	0.964416	0.178151
SM 38:1;O2; [M+H]+	SM 38:1;O2	SM	3.301	759.636	LIPp	LipidBlast	arb. units	2855063	2855720	9515391	9382355	9324086	9620659	10106029	9841519	1562668	1712030	2.85539e+06	9448873	9.47237e+06	9973774	1637349	0.28629	0.947372	0.949728	1	0.164165
SM 38:2;O2; [M+H]+	SM 38:2;O2	SM	3.005	757.621	LIPp	LipidBlast	arb. units	2877233	2956636	6688396	7037592	6064568	6916751	6355994	5945096	1391205	1480229	2.91693e+06	6862994	6.49066e+06	6150545	1435717	0.425024	1	0.945748	0.89619	0.209197
SM 39:1;O2; [M+H]+	SM 39:1;O2	SM	3.463	773.653	LIPp	LipidBlast	arb. units	837634	819593	2785547	2808909	2983932	2939518	2941370	2850836	489663	477051	828614	2797228	2961725	2896103	483357	0.279774	0.944459	1	0.977843	0.163201
SM 40:0;O2; [M+H]+	SM 40:0;O2	SM	3.741	789.682	LIPp	LipidBlast	arb. units	110144	112952	325737	349036	401459	404154	383321	389946	72988	72360	111548	337386	402806	386634	72674	0.276927	0.83759	1	0.959849	0.180419
SM 40:1;O2; [M+H]+	SM 40:1;O2	SM	3.627	787.668	LIPp	LipidBlast	arb. units	6536437	6677754	23911502	25422984	21943392	22250008	25313176	23847134	3625634	3650475	6.6071e+06	24667243	22096700	24580155	3.63805e+06	0.267849	1	0.895791	0.996469	0.147485
SM 40:2;O2; [M+H]+	SM 40:2;O2	SM	3.329	785.652	LIPp	LipidBlast	arb. units	3960836	4031569	13008853	13049274	12711671	12879785	13723185	13723886	2248292	2356060	3.9962e+06	1.30291e+07	12795728	1.37235e+07	2302176	0.291193	0.949396	0.932393	1	0.167754
SM 41:1;O2; [M+H]+	SM 41:1;O2	SM	3.786	801.683	LIPp	LipidBlast	arb. units	2166021	2223501	6768740	6373377	7654491	7494109	7520119	7534280	1318559	1304110	2194761	6.57106e+06	7574300	7.5272e+06	1.31133e+06	0.289764	0.867547	1	0.993782	0.173129
SM 41:2;O2; [M+H]+	SM 41:2;O2	SM	3.487	799.667	LIPp	LipidBlast	arb. units	1396786	1372215	4057294	4202531	4777359	4974741	4595787	4604935	792038	796916	1.3845e+06	4.12991e+06	4876050	4600361	794477	0.283939	0.846979	1	0.943461	0.162935
SM 42:1;O2; [M+H]+	SM 42:1;O2	SM	3.944	815.699	LIPp	LipidBlast	arb. units	3956712	4020312	12813520	12859799	13056347	13361560	14085672	14095391	2303776	2325254	3988512	1.28367e+07	1.3209e+07	1.40905e+07	2314515	0.283063	0.911013	0.937435	1	0.16426
SM 42:2;O2; [M+H]+	SM 42:2;O2	SM	3.612	813.683	LIPp	LipidBlast	arb. units	9364255	9220799	34043592	34912916	31023688	30273774	35015300	32975878	5204838	5060608	9292527	34478254	30648731	33995589	5132723	0.269518	1	0.888929	0.986001	0.148868
SM 42:3;O2; SM 25:3;O2/17:0; [M+H]+	SM 42:3;O2	SM	3.317	811.667	LIPp	LipidBlast	arb. units	5893907	5821552	18051108	19129706	18128488	18698992	19880954	19202162	3190791	3313361	5.85773e+06	18590407	18413740	19541558	3252076	0.299758	0.951327	0.942286	1	0.166418
SM 42:4;O2; [M+H]+	SM 42:4;O2	SM	3.032	809.652	LIPp	LipidBlast	arb. units	1154720	1301459	2944739	3002097	2740599	3224509	2788199	2903688	637278	634673	1.22809e+06	2973418	2982554	2.84594e+06	635976	0.411758	0.996937	1	0.954197	0.213232
SM 43:2;O2; [M+H]+	SM 43:2;O2	SM	3.711	827.698	LIPp	LipidBlast	arb. units	196956	188178	520943	531088	631178	611372	624152	618161	105299	107826	192567	526016	621275	621156	106562	0.309955	0.846671	1	0.999809	0.171522
PC O-32:0; PC O-16:0_16:0; [M+H]+	PC O-32:0	EtherPC	3.183	720.589	LIPp	LipidBlast	arb. units	897840	847320	2796487	2666874	2425623	2579818	2819149	2957666	460102	452356	872580	2.73168e+06	2.50272e+06	2.88841e+06	456229	0.302097	0.945739	0.866471	1	0.157952
PC O-32:1; PC O-16:1_16:0; [M+H]+	PC O-32:1	EtherPC	3.135	718.574	LIPp	LipidBlast	arb. units	885445	876154	2680444	2737728	2465893	2303308	2624816	2660434	480718	444927	880800	2709086	2.3846e+06	2642625	462822	0.325128	1	0.880223	0.975467	0.170841
PC O-34:0; [M+H]+	PC O-34:0	EtherPC	3.506	748.619	LIPp	LipidBlast	arb. units	107668	110692	302847	326718	350653	351445	345581	335756	55283	57834	109180	314782	351049	340668	56558.5	0.311011	0.896691	1	0.97043	0.161113
PC O-34:1; PC O-16:0_18:1; [M+H]+	PC O-34:1	EtherPC	3.2	746.605	LIPp	LipidBlast	arb. units	1606764	1521647	4874219	4797386	4706854	4769062	5380012	5257070	852428	822069	1.56421e+06	4.8358e+06	4737958	5318541	837248	0.294104	0.909235	0.890838	1	0.157421
PC O-34:2 (1); PC O-16:0_18:2; [M+H]+	PC O-34:2 (1)	EtherPC	2.95	744.589	LIPp	LipidBlast	arb. units	2413162	2314724	7175272	7496880	7456280	7005402	7849784	7806693	1230489	1179737	2363943	7336076	7230841	7.82824e+06	1205113	0.301976	0.93713	0.923687	1	0.153944
PC O-34:2 (2); PC O-16:1_18:1; [M+H]+	PC O-34:2 (2)	EtherPC	3.155	744.595	LIPp	LipidBlast	arb. units	558768	597753	3350177	3083066	2995452	2906600	3523659	3392152	482596	444494	578260	3.21662e+06	2951026	3.45791e+06	463545	0.167229	0.930223	0.853414	1	0.134054
PC O-34:3; PC O-16:1_18:2; [M+H]+	PC O-34:3	EtherPC	2.898	742.573	LIPp	LipidBlast	arb. units	4084787	4137129	12563107	12484829	11695664	10982854	13208642	12484224	2247310	2318034	4110958	12523968	11339259	12846433	2282672	0.320008	0.974898	0.882678	1	0.177689
PC O-36:2 (1); PC O-18:0_18:2; [M+H]+	PC O-36:2 (1)	EtherPC	3.268	772.62	LIPp	LipidBlast	arb. units	620616	630965	1886310	1910398	1949572	1897100	2163309	2139624	334462	336849	625790	1898354	1923336	2.15147e+06	335656	0.290867	0.882354	0.893965	1	0.156012
PC O-36:2 (2); [M+H]+	PC O-36:2 (2)	EtherPC	3.478	772.622	LIPp	LipidBlast	arb. units	142585	148513	370586	383957	425900	401690	414873	417095	68408	64671	145549	377272	413795	415984	66539.5	0.349891	0.906938	0.994738	1	0.159957
PC O-36:3 (1); PC O-18:1_18:2; [M+H]+	PC O-36:3 (1)	EtherPC	2.971	770.604	LIPp	LipidBlast	arb. units	1169190	1128558	3144837	3388816	3282021	3288562	3455952	3370256	529086	516535	1148874	3.26683e+06	3.28529e+06	3413104	522810	0.336607	0.957142	0.962552	1	0.153177
PC O-36:3 (2); PC O-18:1_18:2; [M+H]+	PC O-36:3 (2)	EtherPC	3.214	770.605	LIPp	LipidBlast	arb. units	693261	710398	2123915	2059718	2065274	2022697	2284880	2199728	356761	394155	701830	2.09182e+06	2.04399e+06	2242304	375458	0.312995	0.932887	0.911556	1	0.167443
PC O-36:4 (1); PC O-16:0_20:4; [M+H]+	PC O-36:4 (1)	EtherPC	2.893	768.589	LIPp	LipidBlast	arb. units	4583852	4592166	14446726	14082214	13257056	12429306	14498207	14241523	2481328	2521184	4588009	14264470	12843181	14369865	2501256	0.31928	0.992666	0.893758	1	0.174063
PC O-36:4 (2); [M+H]+	PC O-36:4 (2)	EtherPC	2.986	768.589	LIPp	LipidBlast	arb. units	1085951	1120316	2639994	2820502	2160424	2524214	2735282	2754654	461159	484096	1.10313e+06	2730248	2342319	2744968	472628	0.401875	0.994637	0.853314	1	0.17218
PC O-36:5 (1); [M+H]+	PC O-36:5 (1)	EtherPC	2.673	766.574	LIPp	LipidBlast	arb. units	169782	145040	507159	506276	398452	465728	530256	518467	89847	83849	157411	506718	432090	524362	86848	0.300196	0.966351	0.824031	1	0.165626
PC O-36:5 (2); PC O-16:1_20:4; [M+H]+	PC O-36:5 (2)	EtherPC	2.836	766.573	LIPp	LipidBlast	arb. units	4939682	4939871	13375161	14095925	11967846	13027755	14039851	14250596	2492633	2375896	4.93978e+06	13735543	1.24978e+07	1.41452e+07	2.43426e+06	0.349219	0.971038	0.883535	1	0.172091
PC O-38:4; PC O-18:0_20:4; [M+H]+	PC O-38:4	EtherPC	3.21	796.621	LIPp	LipidBlast	arb. units	1620274	1631667	5130546	5043416	4898818	4874074	5502220	5209787	865347	894802	1.62597e+06	5086981	4886446	5.356e+06	880074	0.303579	0.949772	0.912331	1	0.164316
PC O-38:5 (1); PC O-18:1_20:4; [M+H]+	PC O-38:5 (1)	EtherPC	2.904	794.606	LIPp	LipidBlast	arb. units	2962249	2991278	9262809	9079273	8629729	8177491	9366336	9354039	1580115	1569790	2.97676e+06	9171041	8403610	9.36019e+06	1.57495e+06	0.318024	0.979792	0.897804	1	0.168261
PC O-38:5 (2); [M+H]+	PC O-38:5 (2)	EtherPC	3.049	794.606	LIPp	LipidBlast	arb. units	638930	632400	1578075	1464048	1309547	1428502	1492001	1449868	340991	297558	635665	1.52106e+06	1.36902e+06	1.47093e+06	319274	0.417909	1	0.900045	0.967045	0.209902
PC O-38:5 (3); PC O-18:1_20:4; [M+H]+	PC O-38:5 (3)	EtherPC	3.153	794.604	LIPp	LipidBlast	arb. units	874302	910175	2841076	2626630	2530204	2373492	2829339	2911568	464177	455240	892238	2733853	2451848	2.87045e+06	459708	0.310835	0.952412	0.854167	1	0.160152
PC O-38:6 (1); PC O-18:2_20:4; [M+H]+	PC O-38:6 (1)	EtherPC	2.851	792.588	LIPp	LipidBlast	arb. units	1040667	958450	2559098	2778269	2294581	2591436	2932419	2868876	490862	500396	999558	2.66868e+06	2.44301e+06	2.90065e+06	495629	0.344598	0.92003	0.842229	1	0.170868
PC O-38:6 (2); [M+H]+	PC O-38:6 (2)	EtherPC	2.979	792.588	LIPp	LipidBlast	arb. units	471172	439975	806727	924680	562450	582940	1053906	1030430	230842	219353	455574	865704	572695	1042168	225098	0.43714	0.830676	0.549523	1	0.21599
PC O-38:7; [M+H]+	PC O-38:7	EtherPC	2.893	790.571	LIPp	LipidBlast	arb. units	638735	667119	1445981	1408968	912482	823169	1866677	1841549	337781	321404	652927	1.42747e+06	867826	1854113	329592	0.352151	0.769896	0.468054	1	0.177763
PC O-39:10; [M+H]+	PC O-39:10	EtherPC	3.005	798.538	LIPp	LipidBlast	arb. units	1923975	2105230	1558729	1607451	1209328	1349301	1246755	1256723	1349654	1283870	2.0146e+06	1583090	1.27931e+06	1251739	1316762	1	0.785808	0.635021	0.621333	0.653609
PC O-40:4; [M+H]+	PC O-40:4	EtherPC	3.529	824.652	LIPp	LipidBlast	arb. units	220592	217966	575114	606897	633199	673205	678093	708887	111574	122929	219279	591006	653202	693490	117252	0.316196	0.852219	0.941905	1	0.169075
PC O-40:6; [M+H]+	PC O-40:6	EtherPC	2.929	820.624	LIPp	LipidBlast	arb. units	188138	221363	663891	641362	613151	575900	719750	680567	98194	115020	204750	652626	594526	700158	106607	0.292434	0.932113	0.84913	1	0.152261
PC O-42:4; [M+H]+	PC O-42:4	EtherPC	3.838	852.683	LIPp	LipidBlast	arb. units	114849	115898	325678	329020	357790	350422	394516	375980	55049	58811	115374	327349	354106	385248	56930	0.299479	0.84971	0.919164	1	0.147775
PC O-42:5; [M+H]+	PC O-42:5	EtherPC	3.512	850.667	LIPp	LipidBlast	arb. units	220625	211479	644170	646846	694278	674232	702633	744082	106163	121621	216052	645508	684255	723358	113892	0.298679	0.892378	0.945943	1	0.157449
PC O-44:5; [M+H]+	PC O-44:5	EtherPC	3.815	878.699	LIPp	LipidBlast	arb. units	259136	256586	796079	775405	870179	861118	900617	870243	127860	139859	257861	785742	865648	885430	133860	0.291227	0.887413	0.977659	1	0.15118
DG 34:1; DG 16:0_18:1; [M+NH4]+	DG 34:1	DG	3.612	612.556	LIPp	LipidBlast	arb. units	464414	464176	1456545	1516168	1421114	1338945	1322207	1268532	283532	284567	464295	1.48636e+06	1.38003e+06	1.29537e+06	284050	0.312371	1	0.928465	0.871507	0.191105
DG 34:2; DG 16:0_18:2; [M+NH4]+	DG 34:2	DG	3.34	610.54	LIPp	LipidBlast	arb. units	683997	688194	1744044	1761721	1801824	1735558	1567153	1656050	397038	397890	686096	1.75288e+06	1768691	1.6116e+06	397464	0.387911	0.991062	1	0.911183	0.224722
DG 36:1; DG 18:0_18:1; [M+NH4]+	DG 36:1	DG	3.927	640.587	LIPp	LipidBlast	arb. units	66143	77243	145214	162615	155376	184753	160371	156264	48112	44018	71693	153914	170064	158318	46065	0.421564	0.905036	1	0.930926	0.270868
DG 36:2; DG 18:1_18:1; [M+NH4]+	DG 36:2	DG	3.629	638.572	LIPp	LipidBlast	arb. units	451111	432330	1294000	1365374	1383059	1205236	1205698	1117193	269357	285410	441720	1329687	1.29415e+06	1.16145e+06	277384	0.332199	1	0.973272	0.873473	0.208608
DG 36:3; DG 18:1_18:2; [M+NH4]+	DG 36:3	DG	3.363	636.556	LIPp	LipidBlast	arb. units	824343	773653	1940796	1969651	2013023	1961372	1762152	1833291	502856	496531	798998	1.95522e+06	1.9872e+06	1.79772e+06	499694	0.402073	0.98391	1	0.904652	0.251456
DG 36:4; DG 18:2_18:2; [M+NH4]+	DG 36:4	DG	3.1	634.539	LIPp	LipidBlast	arb. units	487761	385507	838911	1098585	949377	792347	820694	925295	252166	268752	436634	968748	870862	872994	260459	0.45072	1	0.898956	0.901157	0.268861
Cer 40:1;O2; Cer 18:1;O2/22:0; [M+H]+	Cer 40:1;O2	Cer	4.002	622.613	LIPp	LipidBlast	arb. units	216073	216224	374823	360424	399396	372299	356791	325478	137265	138024	216148	367624	385848	341134	137644	0.560192	0.952769	1	0.884117	0.356733
Cer 42:1;O2; Cer 18:1;O2/24:0; [M+H]+	Cer 42:1;O2	Cer	4.301	650.644	LIPp	LipidBlast	arb. units	668129	693658	1027865	1075966	1312862	1297905	1037299	1133494	436749	452171	680894	1.05192e+06	1.30538e+06	1.0854e+06	444460	0.521604	0.805829	1	0.831477	0.340482
Cer 42:2;O2; Cer 18:1;O2/24:1; [M+H]+	Cer 42:2;O2	Cer	3.984	648.628	LIPp	LipidBlast	arb. units	215761	202207	366075	357087	472277	438855	353643	350858	138488	146356	208984	361581	455566	352250	142422	0.458735	0.793696	1	0.773215	0.312626
TG 50:2;O2; TG 16:0_16:0_18:2;O2; [M+NH4]+	TG 50:2;O2	OxTG	4.396	880.759	LIPp	LipidBlast	arb. units	104849	92127	217879	214825	261607	285165	194430	204644	77980	71674	98488	216352	273386	199537	74827	0.360253	0.791379	1	0.729873	0.273705
TG 52:3;O; TG 16:0_18:1_18:2;O; [M+NH4]+	TG 52:3;O	OxTG	4.46	890.78	LIPp	LipidBlast	arb. units	644387	669360	1105903	1096292	1381030	1408665	1208543	1197724	397778	400628	656874	1.1011e+06	1.39485e+06	1.20313e+06	399203	0.470929	0.789404	1	0.862556	0.286198
TG 52:3;O2; TG 16:0_18:1_18:2;O2; [M+NH4]+	TG 52:3;O2	OxTG	4.395	906.775	LIPp	LipidBlast	arb. units	1567969	1556146	2935355	2979796	3578905	3820894	2902184	2926754	991436	934626	1.56206e+06	2.95758e+06	3.6999e+06	2914469	963031	0.422189	0.799366	1	0.787716	0.260286
TG 52:4;O; TG 16:0_18:2_18:2;O; [M+NH4]+	TG 52:4;O	OxTG	4.237	888.764	LIPp	LipidBlast	arb. units	521435	498838	870996	842718	1083091	1087710	908384	884271	310330	304627	510136	856857	1.0854e+06	896328	307478	0.469998	0.789439	1	0.825803	0.283286
TG 52:4;O2; TG 16:0_18:2_18:2;O2; [M+NH4]+	TG 52:4;O2	OxTG	4.169	904.759	LIPp	LipidBlast	arb. units	1407714	1414354	4731507	4674086	4352379	4265110	3622071	3743983	779644	837180	1411034	4.7028e+06	4.30874e+06	3683027	808412	0.300041	1	0.916209	0.783157	0.1719
TG 54:3;O2; TG 18:0_18:1_18:2;O2; [M+NH4]+	TG 54:3;O2	OxTG	4.635	934.805	LIPp	LipidBlast	arb. units	197303	210115	330274	327732	473714	486506	383327	389769	137648	142425	203709	329003	480110	386548	140036	0.424297	0.685266	1	0.805124	0.291676
TG 54:4;O; TG 18:1_18:1_18:2;O; [M+NH4]+	TG 54:4;O	OxTG	4.47	916.794	LIPp	LipidBlast	arb. units	284104	283353	477032	451744	619750	595574	534674	497920	162600	161883	283728	464388	607662	516297	162242	0.466918	0.764221	1	0.849645	0.266993
TG 54:4;O2; TG 18:1_18:1_18:2;O2; [M+NH4]+	TG 54:4;O2	OxTG	4.411	932.79	LIPp	LipidBlast	arb. units	794965	820094	1450626	1480824	1850230	1858652	1553980	1463721	465085	500916	807530	1465725	1854441	1.50885e+06	483000	0.435457	0.790386	1	0.813642	0.260456
TG 54:5;O; TG 18:1_18:2_18:2;O; [M+NH4]+	TG 54:5;O	OxTG	4.253	914.779	LIPp	LipidBlast	arb. units	234956	204128	363460	355141	472442	458088	369517	377137	127735	132281	219542	359300	465265	373327	130008	0.471864	0.772249	1	0.802396	0.279428
TG 54:5;O2; TG 18:1_18:2_18:2;O2; [M+NH4]+	TG 54:5;O2	OxTG	4.187	930.774	LIPp	LipidBlast	arb. units	656613	667145	1915322	2004712	1791492	1670939	1401660	1490421	386544	401536	661879	1960017	1.73122e+06	1.44604e+06	394040	0.33769	1	0.883266	0.737769	0.201039
TG 54:6;O2; TG 18:2_18:2_18:2;O2; [M+NH4]+	TG 54:6;O2	OxTG	3.979	928.758	LIPp	LipidBlast	arb. units	170887	192614	314722	317181	391903	377469	302094	307615	110854	113375	181750	315952	384686	304854	112114	0.472465	0.821323	1	0.792476	0.291444
CE 16:0; [M+NH4]+	CE 16:0	CE	5.414	642.618	LIPp	LipidBlast	arb. units	897957	749359	2197648	1829069	1068089	1209585	1314224	1152281	369417	410415	823658	2.01336e+06	1138837	1.23325e+06	389916	0.409097	1	0.56564	0.612535	0.193664
CE 18:1; [M+NH4]+	CE 18:1	CE	5.41	668.633	LIPp	LipidBlast	arb. units	13132644	13513850	30920336	30687938	24135636	25133694	29629106	25628764	6501818	7493634	13323247	30804137	24634665	27628935	6997726	0.432515	1	0.799719	0.896923	0.227168
CE 18:2; [M+NH4]+	CE 18:2	CE	5.184	666.617	LIPp	LipidBlast	arb. units	136122992	130040368	242784656	271469472	203926128	229267456	235799984	231798800	85638384	77524616	133081680	257127064	216596792	233799392	81581500	0.517572	1	0.842373	0.909276	0.317281
CE 18:3 (1); [M+NH4]+	CE 18:3 (1)	CE	4.06	664.606	LIPp	LipidBlast	arb. units	196072	227298	466604	441326	585414	520136	414167	434035	130232	118813	211685	453965	552775	424101	124522	0.38295	0.821247	1	0.767222	0.225268
CE 18:3 (2); [M+NH4]+	CE 18:3 (2)	CE	4.981	664.602	LIPp	LipidBlast	arb. units	402704	409182	1780400	1703711	1638233	1598665	1582574	1596654	140121	152421	405943	1.74206e+06	1618449	1589614	146271	0.233025	1	0.929046	0.912493	0.0839646
CE 20:3; [M+NH4]+	CE 20:3	CE	5.212	692.633	LIPp	LipidBlast	arb. units	2892144	3051731	7349272	7289290	6101126	5822414	7163142	6369408	1583052	1688510	2.97194e+06	7319281	5961770	6766275	1635781	0.406042	1	0.814529	0.924445	0.223489
CE 20:4; [M+NH4]+	CE 20:4	CE	5.055	690.617	LIPp	LipidBlast	arb. units	9951464	9739759	36829424	37382116	28162652	28271260	28993756	30572716	3991942	3968901	9.84561e+06	37105770	28216956	29783236	3.98042e+06	0.265339	1	0.760447	0.802658	0.107272
CE 20:5; [M+NH4]+	CE 20:5	CE	4.846	688.602	LIPp	LipidBlast	arb. units	134955	121549	378066	357068	416933	455019	402268	422020	60034	72213	128252	367567	435976	412144	66123.5	0.294172	0.84309	1	0.945336	0.151668
CE 22:6; [M+NH4]+	CE 22:6	CE	4.934	714.617	LIPp	LipidBlast	arb. units	200627	226467	618560	607625	671488	752413	710880	628724	103145	102142	213547	613092	711950	669802	102644	0.299946	0.861145	1	0.940799	0.144172
TG 40:0; TG 12:0_12:0_16:0; [M+NH4]+	TG 40:0	TG	4.564	712.645	LIPp	LipidBlast	arb. units	32496	40850	62789	62856	79879	77373	54944	65460	14510	9796	36673	62822.5	78626	60202	12153	0.466423	0.799004	1	0.765675	0.154567
TG 42:0; TG 12:0_14:0_16:0; [M+NH4]+	TG 42:0	TG	4.823	740.676	LIPp	LipidBlast	arb. units	68349	86914	134402	139628	196425	181577	154107	148435	50806	44292	77631.5	137015	189001	151271	47549	0.410747	0.724943	1	0.800371	0.251581
TG 42:1; TG 12:0_12:0_18:1; [M+NH4]+	TG 42:1	TG	4.573	738.659	LIPp	LipidBlast	arb. units	62027	70872	108550	106380	137802	150070	122496	105867	34323	38770	66449.5	107465	143936	114182	36546.5	0.46166	0.746617	1	0.79328	0.253908
TG 44:0; TG 14:0_14:0_16:0; [M+NH4]+	TG 44:0	TG	5.06	768.706	LIPp	LipidBlast	arb. units	354529	384238	1065495	1230782	841757	966555	931193	912229	197422	172275	369384	1.14814e+06	904156	921711	184848	0.321724	1	0.787497	0.802787	0.160998
TG 44:1; TG 10:0_16:0_18:1; [M+NH4]+	TG 44:1	TG	4.827	766.691	LIPp	LipidBlast	arb. units	218321	204783	362456	371254	493844	514721	416976	395363	134920	133320	211552	366855	504282	406170	134120	0.419511	0.727479	1	0.80544	0.265962
TG 44:2; TG 10:0_16:0_18:2; [M+NH4]+	TG 44:2	TG	4.602	764.674	LIPp	LipidBlast	arb. units	92506	84420	146360	156966	192862	201575	169090	175509	49168	56839	88463	151663	197218	172300	53003.5	0.448553	0.76901	1	0.873648	0.268755
TG 46:0; TG 14:0_16:0_16:0; [M+NH4]+	TG 46:0	TG	5.298	796.738	LIPp	LipidBlast	arb. units	895697	809311	2260006	2113140	2241360	1940711	2065409	2147220	489177	456031	852504	2186573	2.09104e+06	2.10631e+06	472604	0.389881	1	0.956307	0.963295	0.216139
TG 46:1; TG 12:0_16:0_18:1; [M+NH4]+	TG 46:1	TG	5.067	794.722	LIPp	LipidBlast	arb. units	1522054	1574611	4888174	4972597	3998862	4359954	3911796	4058167	784116	836010	1.54833e+06	4.93039e+06	4179408	3.98498e+06	810063	0.314039	1	0.847684	0.808249	0.1643
TG 46:2; TG 12:0_16:0_18:2; [M+NH4]+	TG 46:2	TG	4.848	792.706	LIPp	LipidBlast	arb. units	430076	371918	761394	712834	968945	920123	796378	839876	249083	240777	400997	737114	944534	818127	244930	0.424545	0.7804	1	0.86617	0.259313
TG 48:0; TG 14:0_16:0_18:0; [M+NH4]+	TG 48:0	TG	5.5	824.769	LIPp	LipidBlast	arb. units	2313301	2491428	5918418	5976492	5476208	5154046	5789848	5650418	1244964	1250435	2.40236e+06	5947455	5315127	5720133	1.2477e+06	0.403932	1	0.893681	0.961778	0.209787
TG 48:1; TG 14:0_16:0_18:1; [M+NH4]+	TG 48:1	TG	5.29	822.753	LIPp	LipidBlast	arb. units	6472442	6125356	16709016	16503251	15716617	15564407	14538076	15594427	3445372	3250683	6298899	1.66061e+07	15640512	1.50663e+07	3.34803e+06	0.379312	1	0.941852	0.90727	0.201614
TG 48:2; TG 14:0_16:0_18:2; [M+NH4]+	TG 48:2	TG	5.081	820.738	LIPp	LipidBlast	arb. units	3852168	3766463	11683837	12371268	9932788	11105002	9674650	10533992	2049104	2079178	3.80932e+06	1.20276e+07	10518895	10104321	2064141	0.316716	1	0.874567	0.840098	0.171618
TG 48:3; TG 12:0_18:1_18:2; [M+NH4]+	TG 48:3	TG	4.862	818.722	LIPp	LipidBlast	arb. units	644109	610589	1157893	1176706	1489439	1466049	1188189	1211174	356315	387150	627349	1.1673e+06	1477744	1.19968e+06	371732	0.424532	0.78992	1	0.811833	0.251554
TG 48:4; TG 12:0_18:2_18:2; [M+NH4]+	TG 48:4	TG	4.645	816.707	LIPp	LipidBlast	arb. units	98769	93011	150794	145779	225507	207530	168035	165557	53400	58217	95890	148286	216518	166796	55808.5	0.442872	0.684868	1	0.770354	0.257754
TG 49:1; TG 15:0_16:0_18:1; [M+NH4]+	TG 49:1	TG	5.388	836.768	LIPp	LipidBlast	arb. units	1258766	1192349	2780476	2886714	2576460	2659527	2680538	2632236	699346	675298	1.22556e+06	2833595	2.61799e+06	2656387	687322	0.43251	1	0.923912	0.937462	0.242562
TG 49:2; TG 15:0_16:0_18:2; [M+NH4]+	TG 49:2	TG	5.186	834.751	LIPp	LipidBlast	arb. units	1265675	1254827	1993638	2089508	1669987	2107924	1988483	2003380	737433	802623	1260251	2041573	1.88896e+06	1.99593e+06	770028	0.617294	1	0.925245	0.977644	0.377174
TG 49:3; TG 15:0_16:1_18:2; [M+NH4]+	TG 49:3	TG	4.977	832.738	LIPp	LipidBlast	arb. units	93413	81775	215919	200435	212077	233738	173918	203274	53726	52750	87594	208177	222908	188596	53238	0.392961	0.933917	1	0.846073	0.238834
TG 50:0; TG 16:0_16:0_18:0; [M+NH4]+	TG 50:0	TG	5.686	852.801	LIPp	LipidBlast	arb. units	980142	948047	2192234	2260739	2082529	2027108	1975967	2029310	511399	511648	964094	2.22649e+06	2.05482e+06	2.00264e+06	511524	0.433012	1	0.922897	0.899461	0.229745
TG 50:1; TG 16:0_16:0_18:1; [M+NH4]+	TG 50:1	TG	5.493	850.785	LIPp	LipidBlast	arb. units	21645816	22932138	55525516	57296184	55082344	52524320	54889672	53063120	11625352	11633849	22288977	56410850	53803332	53976396	1.16296e+07	0.395119	1	0.953776	0.956844	0.206159
TG 50:2; TG 16:0_16:1_18:1; [M+NH4]+	TG 50:2	TG	5.294	848.769	LIPp	LipidBlast	arb. units	25984548	24713582	63209240	59335248	58714204	58687412	54420980	58927576	13160609	12594189	25349065	61272244	58700808	56674278	12877399	0.413712	1	0.958033	0.924958	0.210167
TG 50:3; TG 16:0_16:1_18:2; [M+NH4]+	TG 50:3	TG	5.088	846.753	LIPp	LipidBlast	arb. units	7597839	7553016	23244290	22426984	20893154	21434896	19716204	20369534	4261998	4385090	7.57543e+06	22835637	21164025	20042869	4323544	0.331737	1	0.926798	0.877701	0.189333
TG 50:4; TG 16:0_16:1_18:3; [M+NH4]+	TG 50:4	TG	4.891	844.738	LIPp	LipidBlast	arb. units	909540	886188	1746780	1684719	2172641	2234522	1935113	1927684	574290	562965	897864	1.71575e+06	2.20358e+06	1.9314e+06	568628	0.407457	0.778619	1	0.876482	0.258047
TG 50:5; TG 14:0_18:2_18:3; [M+NH4]+	TG 50:5	TG	4.71	842.723	LIPp	LipidBlast	arb. units	88372	90292	130042	139619	180220	195530	158257	170948	52186	53584	89332	134830	187875	164602	52885	0.475486	0.717661	1	0.876128	0.28149
TG 51:1; TG 16:0_17:0_18:1; [M+NH4]+	TG 51:1	TG	5.573	864.8	LIPp	LipidBlast	arb. units	412857	425753	890544	895527	1045156	1040435	916451	926768	284448	268222	419305	893036	1.0428e+06	921610	276335	0.402097	0.856386	1	0.883787	0.264994
TG 51:2; TG 16:0_17:1_18:1; [M+NH4]+	TG 51:2	TG	5.393	862.784	LIPp	LipidBlast	arb. units	3152281	3207846	6894150	7147252	6250302	6501471	6753732	6809088	1738333	1640673	3.18006e+06	7020701	6.37589e+06	6781410	1689503	0.452955	1	0.908155	0.965916	0.240646
TG 51:3; TG 15:0_18:1_18:2; [M+NH4]+	TG 51:3	TG	5.198	860.768	LIPp	LipidBlast	arb. units	2434913	2238954	4421743	4429480	3986793	4117408	4266094	4200376	1428852	1511302	2.33693e+06	4.42561e+06	4.0521e+06	4233235	1470077	0.528048	1	0.915602	0.956531	0.332175
TG 51:4; TG 15:0_18:2_18:2; [M+NH4]+	TG 51:4	TG	5.012	858.753	LIPp	LipidBlast	arb. units	181981	196096	429168	462088	477140	455664	400687	396216	89099	114423	189038	445628	466402	398452	101761	0.405312	0.955459	1	0.854309	0.218183
TG 52:0; TG 16:0_18:0_18:0; [M+NH4]+	TG 52:0	TG	5.863	880.831	LIPp	LipidBlast	arb. units	1253445	1363508	1077787	1100029	854742	943323	940414	994878	332801	324204	1.30848e+06	1088908	899032	967646	328502	1	0.832195	0.687083	0.739521	0.251057
TG 52:1; TG 16:0_18:0_18:1; [M+NH4]+	TG 52:1	TG	5.676	878.816	LIPp	LipidBlast	arb. units	4368147	4387020	11977956	11759687	12151920	11796024	10687900	10814710	2487934	2566508	4.37758e+06	1.18688e+07	11973972	10751305	2527221	0.365592	0.991218	1	0.89789	0.21106
TG 52:2; TG 16:0_18:1_18:1; [M+NH4]+	TG 52:2	TG	5.485	876.8	LIPp	LipidBlast	arb. units	62353160	63442136	156515520	163565632	154851008	146270592	154790528	147651760	32616148	33368418	62897648	160040576	150560800	151221144	32992283	0.393011	1	0.940766	0.944893	0.206149
TG 52:3; TG 16:0_18:1_18:2; [M+NH4]+	TG 52:3	TG	5.313	874.785	LIPp	LipidBlast	arb. units	80391752	77885104	188152992	184736800	170048432	176000480	165421408	175960256	38771512	38020136	79138428	186444896	173024456	170690832	38395824	0.42446	1	0.928019	0.915503	0.205937
TG 52:4; TG 16:0_18:2_18:2; [M+NH4]+	TG 52:4	TG	5.12	872.77	LIPp	LipidBlast	arb. units	21162646	19708532	59289416	60682560	55734528	58609680	53302536	52584008	12012764	11770873	20435589	59985988	57172104	52943272	1.18918e+07	0.340673	1	0.953091	0.882594	0.198243
TG 52:5; TG 16:1_18:2_18:2; [M+NH4]+	TG 52:5	TG	4.939	870.754	LIPp	LipidBlast	arb. units	1527045	1650672	3365410	3455342	3974239	4203224	3522074	3282484	942980	985732	1.58886e+06	3410376	4.08873e+06	3402279	964356	0.388594	0.834091	1	0.832111	0.235857
TG 53:3; TG 17:0_18:1_18:2; [M+NH4]+	TG 53:3	TG	5.401	888.8	LIPp	LipidBlast	arb. units	2278703	2217270	4631891	4691138	4162134	4421090	4517192	4628599	1298792	1234542	2.24799e+06	4.66151e+06	4291612	4.5729e+06	1266667	0.482244	1	0.920648	0.980989	0.271729
TG 53:4; TG 17:1_18:1_18:2; [M+NH4]+	TG 53:4	TG	5.208	886.785	LIPp	LipidBlast	arb. units	993424	1116316	1890933	2014528	1914955	1767762	2031254	1772810	684038	556789	1054870	1.95273e+06	1.84136e+06	1902032	620414	0.540203	1	0.942966	0.974037	0.317716
TG 54:0; TG 18:0_18:0_18:0; [M+NH4]+	TG 54:0	TG	6.033	908.866	LIPp	LipidBlast	arb. units	104565	84857	30493	25647	28856	20211	14381	12264	16521	31402	94711	28070	24533.5	13322.5	23961.5	1	0.296375	0.259035	0.140665	0.252996
TG 54:1; TG 18:0_18:0_18:1; [M+NH4]+	TG 54:1	TG	5.845	906.848	LIPp	LipidBlast	arb. units	1502722	1506741	3050805	3031670	2740073	2710745	2896894	2882769	819040	901049	1.50473e+06	3.04124e+06	2725409	2.88983e+06	860044	0.494776	1	0.896151	0.950216	0.282794
TG 54:2; TG 18:0_18:1_18:1; [M+NH4]+	TG 54:2	TG	5.671	904.831	LIPp	LipidBlast	arb. units	3837819	3650973	10213001	10005009	10399815	10118619	8937346	9120343	2135488	2150626	3744396	10109005	10259217	9.02884e+06	2143057	0.364979	0.985358	1	0.880072	0.208891
TG 54:3; TG 18:0_18:1_18:2; [M+NH4]+	TG 54:3	TG	5.496	902.816	LIPp	LipidBlast	arb. units	17021784	17210880	44061108	45447860	43127848	40513260	42825196	40677260	8851456	8954889	17116332	44754484	41820554	41751228	8.90317e+06	0.38245	1	0.934444	0.932895	0.198934
TG 54:4; TG 18:1_18:1_18:2; [M+NH4]+	TG 54:4	TG	5.318	900.8	LIPp	LipidBlast	arb. units	18105996	17685758	43511620	42837064	38649528	39167236	37855640	40329644	8341007	8484302	17895877	43174342	38908382	39092642	8.41265e+06	0.414503	1	0.901192	0.90546	0.194853
TG 54:5 (1); TG 18:1_18:2_18:2; [M+NH4]+	TG 54:5 (1)	TG	5.131	898.784	LIPp	LipidBlast	arb. units	5948007	5849018	17301434	17654828	15950589	17080104	15303814	15281964	3227595	3395230	5.89851e+06	17478131	1.65153e+07	15292889	3.31141e+06	0.33748	1	0.944915	0.874973	0.18946
TG 54:5 (2); TG 16:0_18:1_20:4; [M+NH4]+	TG 54:5 (2)	TG	5.22	898.785	LIPp	LipidBlast	arb. units	2292788	2265396	6395565	6201911	5326312	5460233	5842490	5148476	1497604	1421987	2279092	6298738	5.39327e+06	5495483	1.4598e+06	0.361833	1	0.856247	0.872474	0.23176
TG 54:6 (1); TG 18:1_18:2_18:3; [M+NH4]+	TG 54:6 (1)	TG	4.932	896.769	LIPp	LipidBlast	arb. units	1123879	1202908	2375684	2391348	2761768	2847417	2420232	2416468	710371	729422	1.16339e+06	2383516	2.80459e+06	2418350	719896	0.414817	0.849862	1	0.862282	0.256685
TG 54:6 (2); TG 16:0_18:2_20:4; [M+NH4]+	TG 54:6 (2)	TG	5.051	896.769	LIPp	LipidBlast	arb. units	1421263	1466156	4363219	4279238	3770507	3684605	3605304	3665454	798253	784767	1.44371e+06	4.32123e+06	3727556	3635379	791510	0.334097	1	0.862615	0.841284	0.183168
TG 54:7; TG 18:2_18:2_18:3; [M+NH4]+	TG 54:7	TG	4.74	894.752	LIPp	LipidBlast	arb. units	199685	197647	301423	305442	439370	429001	334097	343453	110286	112741	198666	303432	434186	338775	111514	0.45756	0.698855	1	0.780254	0.256834
TG 56:2; TG 18:0_18:1_20:1; [M+NH4]+	TG 56:2	TG	5.84	932.861	LIPp	LipidBlast	arb. units	435184	461053	885967	1025683	761553	851240	833466	901220	229471	277091	448118	955825	806396	867343	253281	0.468829	1	0.843665	0.907429	0.264987
TG 56:3; TG 18:0_20:1_18:2; [M+NH4]+	TG 56:3	TG	5.667	930.847	LIPp	LipidBlast	arb. units	307368	314552	883738	807948	820244	852876	721746	732173	171203	156419	310960	845843	836560	726960	163811	0.367633	1	0.989025	0.85945	0.193666
TG 56:4; TG 18:1_20:1_18:2; [M+NH4]+	TG 56:4	TG	5.496	928.831	LIPp	LipidBlast	arb. units	513971	536439	1434674	1470441	1312729	1257906	1310586	1363618	258043	250438	525205	1.45256e+06	1.28532e+06	1337102	254240	0.361573	1	0.884865	0.920516	0.17503
TG 56:5 (1); TG 16:0_18:1_22:4; [M+NH4]+	TG 56:5 (1)	TG	5.373	926.815	LIPp	LipidBlast	arb. units	399641	396529	2256498	2265687	2019212	2141008	2079613	2460557	590064	634752	398085	2.26109e+06	2080110	2270085	612408	0.175361	0.996039	0.916314	1	0.269773
TG 56:5 (2); TG 18:0_18:1_20:4; [M+NH4]+	TG 56:5 (2)	TG	5.43	926.816	LIPp	LipidBlast	arb. units	1197404	1119242	2538308	2632696	2288379	2289007	2309836	2460557	631169	634752	1158323	2585502	2288693	2.3852e+06	632960	0.448007	1	0.885203	0.922527	0.244811
TG 56:6; TG 16:0_18:1_22:5; [M+NH4]+	TG 56:6	TG	5.217	924.8	LIPp	LipidBlast	arb. units	1654051	1634783	3861769	3929524	3369258	3492199	3699268	3242503	986775	937440	1644417	3.89565e+06	3.43073e+06	3.47089e+06	962108	0.422117	1	0.880657	0.890965	0.24697
TG 56:7 (1); TG 18:1_18:2_20:4; [M+NH4]+	TG 56:7 (1)	TG	5.048	922.784	LIPp	LipidBlast	arb. units	894619	915510	2767933	2558445	2464604	2191298	2393051	2392826	510067	495304	905064	2663189	2327951	2.39294e+06	502686	0.339842	1	0.874122	0.898524	0.188753
TG 56:7 (2); TG 16:0_18:1_22:6; [M+NH4]+	TG 56:7 (2)	TG	5.15	922.785	LIPp	LipidBlast	arb. units	408874	451618	983680	998774	877188	987758	953809	957004	221100	237764	430246	991227	932473	955406	229432	0.434054	1	0.940726	0.963862	0.231463
TG 56:8 (1); TG 18:2_18:2_20:4; [M+NH4]+	TG 56:8 (1)	TG	4.858	920.769	LIPp	LipidBlast	arb. units	170747	164324	312295	291962	380431	356484	296986	322409	96954	98657	167536	302128	368458	309698	97805.5	0.454694	0.819982	1	0.840524	0.265446
TG 56:8 (2); TG 16:0_20:4_20:4; [M+NH4]+	TG 56:8 (2)	TG	4.953	920.769	LIPp	LipidBlast	arb. units	128793	98162	289696	289955	336758	324421	273602	270462	37292	51669	113478	289826	330590	272032	44480.5	0.343258	0.876693	1	0.822869	0.134549
TG 58:1; TG 16:0_24:0_18:1; [M+NH4]+	TG 58:1	TG	6.126	962.908	LIPp	LipidBlast	arb. units	44863	32946	66618	71630	105040	91176	60324	67012	20692	27018	38904.5	69124	98108	63668	23855	0.396548	0.70457	1	0.648958	0.24315
TG 60:2; TG 24:0_18:1_18:1; [M+NH4]+	TG 60:2	TG	6.123	988.924	LIPp	LipidBlast	arb. units	33773	24725	59821	54421	72739	101779	65808	66811	24539	11175	29249	57121	87259	66309.5	17857	0.335198	0.654614	1	0.759916	0.204644

## Sheet: Table S2
	Table S2. Overview of LC-MS-grade solvents (isopropanol, methanol, acetonitrile, and water)
	Isopropanol
	#	Producer	Name
	1	Acrós Organics	Isopropanol OPTIMA LC-MS Grade
	2	Biosolve	2-Propanol LC-MS, min. 99.95%
	3	Biosolve	2-Propanol ULC/MS - CC/SFC, min. 99.95%
	4	Carl Roth	2-Propanol ROTISOLV® min. 99.95% LC-MS Grade
	5	Carl Roth	2-Propanol ROTISOLV® min. 99.95% Ultra LC-MS
	6	Carlo Erba Reagents	Propane-2-ol - RS - For LC/MS
	7	Centralchem	izo-Propylalkohol SOLVANAL LC-MS
	8	Chem-Lab nv	Propanol-2 (iso-Propanol), LC-MS grade
	9	Chemsolute	2-Propanol for LC-MS (min. 99.95) CHEMSOLUTE®
	10	Dawon Science	2-Propanol, ≥99.9%, I1190, LC/MS
	11	Fisher Scientific	Isopropanol, Optima™LC/MS Grade, Fisher Chemical™, ≥99.90%
	12	Fisher Scientific	2-Propanol, LC-MS Grade, Scharlab
	13	FUJIFILM Wako Pure Chemical Corporation	2-Propanol (HPLC, LC/MS)
	14	Honeywell	2-Propanol ≥99.9%, CHROMASOLV™ for LC-MS
	15	J.T.Baker	2-Propanol ≥99.8%, BAKER ANALYZED® for LC-MS
	16	Labkem	2-Propanol LC/MS LGR
	17	neoFroxx	2-Propanol für die LC-MS
	18	ProteoChem	LCMS grade Isopropyl Alcohol (IPA)
	19	Rathburn Chemicals	2-Propanol (LCMS)
	20	RCI Labscan	Propan-2-ol, LC-MS
	21	Scharlau	Propan-2-ol, LC-MS grade 2.5L
	22	Supelco	2-Propanol hypergrade for LC-MS LiChrosolv®
	23	VWR	2-Propanol ≥99.9%, HiPerSolv CHROMANORM® for LC-MS
	Methanol
	#	Producer	Name
	1	Acrós Organics	Methanol for HPLC-MS
	2	Agilent Technologies	LC/MS Methanol
	3	Agilent Technologies	InfinityLab Ultrapure LC/MS grade methanol
	4	Alfa Aesar	Methanol, LC-MS Grade, 99.8+%
	5	Analytichem	Methanol LC-MS >99.9%
	6	Biosolve	Methanol Absolute, LC-MS Grade 99.95%
	7	Birch Biotech	Pristine® Methanol, LC-MS Grade
	8	Caledon Laboratories	Methanol Ultra LC/MS
	9	Carl Roth	Methanol ROTISOLV® Ultra LC-MS, min. 99.98%
	10	Central Drug House	Methanol fort LC-MS (Methyl alcohol)
	11	Centralchem	Metanol SOLVANAL LC-MS
	12	Chem Lab	Methanol, LC-MS grade
	13	Chemsolute	Methanol for LC-MS (min. 99.95)
	14	CPI International	Methanol, LC-MS Grade
	15	Finar Chemicals/Duksan Pure Chemicals	Methanol LCMS Grade
	16	Fisher Scientific	Methanol, Optima™ LC/MS Grade, Fisher Chemical
	17	FUJIFILM Wako Pure Chemical Corporation	Methanol for LC/MS
	18	GFS Chemicals	Methyl Alcohol, LC-MS (Veritas Ultimate)
	19	Honeywell	Methanol LC-MS Ultra CHROMASOLV, tested for UHPLC-MS
	20	Honeywell	Methanol LC-MS CHROMASOLV
	21	J.T.Baker	Methanol ≥99.9%, BAKER ANALYZED® LC-MS for HPLC
	22	J.T.Baker	Methanol ≥99.9%, BAKER ANALYZED ULTRA LC/MS™ for LC-MS
	23	J.T.Baker	Methanol BAKER ANALYZED® for LC-MS
	24	Lab Alley	Methanol 99% LC/MS Grade
	25	Labkem	Methanol LC/MS LGR
	26	Loba Chemie	Methanol LC-MS
	27	PanReac AppliChem	Methanol for LC-MS
	28	Perkin Elmer	Perkin Elmer Methanol, LC/MS Grade, ≥99.9%
	29	Pharmco by Greenfield Global	Methanol (absolute), LC/MS
	30	Promochem	Methanol, LC-MS Optigrade
	31	ProteoChem	LCMS Methanol
	32	Rathburn Chemicals	Methanol (LCMS)
	33	RCI Labscan	Methanol, LC-MS
	34	Ricca Chemical Company	Methanol, LC-MS
	35	Scharlau	Methanol, LC-MS Grade, Scharlab
	36	Sigma-Aldrich	Methanol UHPLC, suitable for mass spectrometry (MS)
	37	Spectrum Chemical MFG Corp	Methyl Alcohol, LC/MS Grade
	38	Supelco	Methanol hypergrade for LC-MS LiChrosolv®
	39	Supelco	Methanol for UHPLC-MS LiChrosolv®
	40	Supelco	Methanol ≥99.9%, OmniSolv® LC-MS for LC-MS
	41	Thermo Scientific	Methanol ≥99.8% for LC-MS
	42	Tianjin Concord Technology	LC-M Grade Methanol
	43	Van Hees	Methanol, LC-MS grade
	44	VWR	Methanol ≥99.9%, HiPerSolv CHROMANORM®, ULTRA for LC-MS
	45	VWR	Methanol HiPerSolv CHROMANORM®, Ultra Plus for LC-MS
	Acetonitrile
	#	Producer	Name
	1	Acrós Organics	Acetonitrile OPTIMA LC-MS Grade
	2	Acrós Organics	Acetonitrile for HPLC-MS
	3	Agilent Technologies	InfinityLab Ultrapure LC/MS grade acetonitrile
	4	Analytichem	Acetonitrile LC-MS >99.9%
	5	Biosolve	Acetonitrile, LC-MS Grade 99.95%
	6	Birch Biotech	Pristine Acetonitrile, LC-MS Grade
	7	Caledon Laboratories	Acetonitrile Ultra LC/MS
	8	Carl Roth	Acetonitrile ROTISOLV® LC-MS Grade, min. 99.95%
	9	Centralchem	Acetonitril SOLVANAL LC-MS
	10	Chem Lab	Acetonitrile, LC-MS grade
	11	Chemsolute	Acetonitrile for LC-MS (min. 99.95%)
	12	Chemsolute	Acetonitrile for UHPLC-MS (min. 99.97%)
	13	Finar Chemicals/Duksan Pure Chemicals	Acetonitrile LCMS Grade
	14	FUJIFILM Wako Pure Chemical Corporation	Acetonitrile for LC/MS
	15	GFS Chemicals	Acetonitrile, LC-MS (VERITAS ULTIMATE)
	16	Honeywell	Acetonitrile LC-MS CHROMASOLV
	17	Honeywell	Acetonitrile LC-MS Ultra CHROMASOLV
	18	J.T.Baker	Acetonitrile ≥99.9%, BAKER ANALYZED ULTRA LC/MS™ for LC-MS
	19	J.T.Baker	Acetonitrile BAKER ANALYZED® for LC-MS, J.T.Baker®
	20	J.T.Baker	Acetonitrile LiChrosolv®, hypergrade for LC-MS, Supelco®
	21	Lab Alley	Acetonitrile, LC/MS Grade
	22	Labkem	Acetonitrile LC/MS LGR
	23	Loba Chemie	Acetonitrile LC-MS
	24	Merck (Supelco)	LC-MS Acetonitrile, OmniSolv, MilliporeSigma™
	25	NeoFroxx	Acetonitrile for ULC-MS
	26	PanReac AppliChem	Acetonitrile for LC-MS
	27	Perkin Elmer	Perkin Elmer Acetonitrile, LC/MS Grade, ≥99.9%
	28	Pharmco by Greenfield Global	Acetonitrile, LC/MS
	29	Promochem	Acetonitrile, LC-MS Optigrade
	30	ProteoChem	LCMS Acetonitrile
	31	Rathburn Chemicals	Acetonitrile (LCMS)
	32	RCI Labscan	Acetonitrile, LC-MS
	33	Ricca Chemical Company	Acetonitrile, LC-MS
	34	Scharlau	Acetonitrile, LC-MS, Scharlab
	35	Spectrum Chemical MFG Corp	Acetonitrile, LCMS
	36	Supelco	Acetonitrile hypergrade for LC-MS LiChrosolv®
	37	Thermo Scientific	Acetonitrile Pierce™ - LC-MS
	38	Thermo Scientific	Acetonitrile ≥99.8% for LC-MS
	39	Tianjin Concord Technology	LC-MS grade Acetonitrile
	40	Van Hees	Acetonitril, LC-MS grade
	41	VWR	Acetonitrile ≥99.9%, HiPerSolv CHROMANORM® for LC-MS
	42	VWR	Acetonitrile ≥99.95%, HiPerSolv CHROMANORM® ULTRA for LC-MS
	Water
	#	Producer	Name
	1	Acrós Organics	Water OPTIMA LC-MS Grade
	2	Agilent Technologies	InfinityLab Ultrapure LC/MS grade water
	3	Analytichem	Water LC-MS
	4	Biosolve	Water, LC-MS Grade
	5	Birch Biotech	Pristine Water, LC-MS Grade
	6	Caledon Laboratories	Water Ultra LC/MS
	7	Carl Roth	Water ROTISOLV LC-MS Grade
	8	Carl Roth	Water ROTISOLV Ultra LC-MS
	9	Carlo Erba Reagents	Water RS - For LC/MS
	10	Carlo Erba Reagents	Water RS - For UHPLC-MS
	11	Dawon Science	Water, 3042, LC-MS GRADE
	12	Centralchem	Voda SOLVANAL LC-MS
	13	Chem Lab	Water, LC-MS Grade
	14	Finar Chemicals/Duksan Pure Chemicals	Water LC-MS
	15	FUJIFILM Wako Pure Chemical Corporation	Ultrapure Water for LC/MS
	16	GFS Chemicals	Water, LC-MS (VERITAS ULTIMATE)
	17	Honeywell	Water CHROMASOLV™ LC-MS Ultra
	18	Honeywell	Water LC-MS Ultra CHROMASOLV®
	19	Honeywell	Water LC-MS CHROMASOLV®
	20	Instruchemie	Water LC-MS/UHPLC/HPLC Grade
	21	J.T.Baker	Water BAKER ANALYZED ULTRA LC/MS™ for LC-MS
	22	J.T.Baker	Water BAKER ANALYZED® for LC-MS, J.T.Baker®
	23	Lab Alley	Water, LC/MS Grade
	24	Loba Chemie	Water LC-MS
	25	Merck	Water LiChrosolv® for chromatography, for LC-MS, Supelco®
	26	Merck (Supelco)	Water, For LC-MS, OmniSolv™, MilliporeSigma™
	27	neoFroxx	Water for ULC-MS
	28	PanReac AppliChem	Water for LC-MS
	29	Perkin Elmer	Water, LC/MS Grade, ≥99.9%
	30	Pharmco by Greenfield Global	Water, LC/MS
	31	Promochem	Water, LC-MS Optigrade
	32	ProteoChem	LCMS Water
	33	Rathburn Chemicals	Water (LCMS)
	34	RCI Labscan	Water, LC-MS
	35	Ricca Chemical Company	Water, LC-MS Grade
	36	Scharlau	Water, LC-MS
	37	Supelco	Water for chromatography (LC-MS Grade) LiChrosolv®
	38	Th. Geyer	Water LC-MS
	39	Thermo Fisher Scientific	Water Pierce™ for LC-MS
	40	Tianjin Concord Technology	LC-MS GRADE WATER
	41	VWR	Water HiPerSolv CHROMANORM® for LC-MS
